# Supplementary material for: Human Microbiome Mixture Analysis Using Weighted Quantile Sum Regression
Source: MDPI journal article supplement (doi:10.3390/ijerph20010094), 2022-12-21
Supplement: s1 [file s1]

## Human Microbiome Mixture Analysis using Weighted Quantile Sum Regression

Shoshannah Eggers, PhD, Moira Bixby, MPH, Stefano Renzetti, PhD, Paul Curtin, PhD, Chris Gennings, PhD

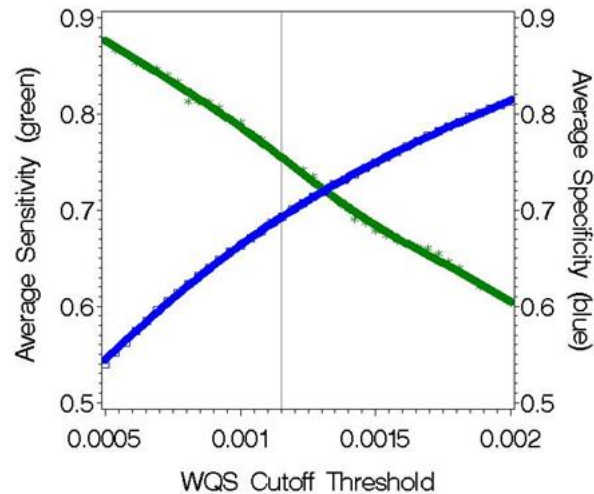

**Supplemental Figure S1: WQS Sensitivity and Specificity.** Average sensitivity and specificity based on a range of threshold cutoff values from 30 repeated holdout analyses for the Weighted Quantile Sum (WQS) operational taxonomic unit (OTU) index including 868 components.

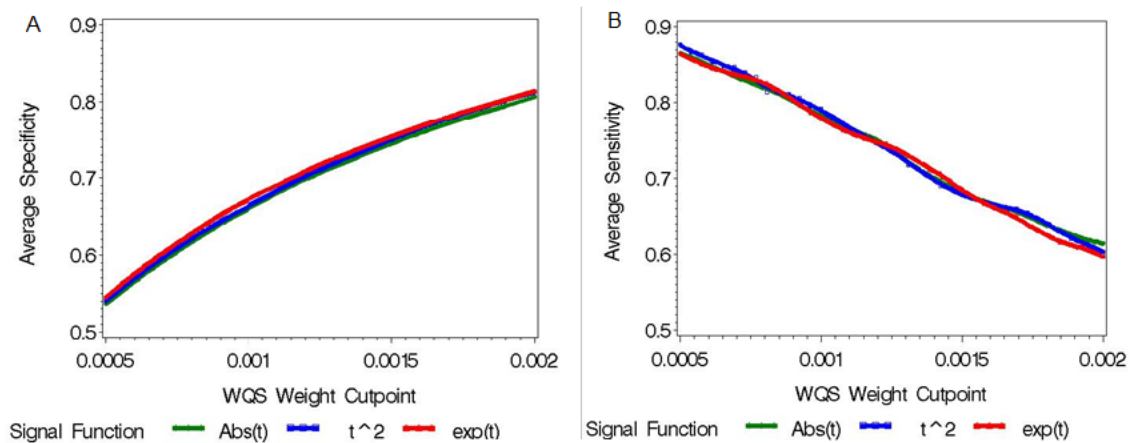

**Supplemental Figure S2: LOESS plots of the average (A) specificity; and (B) sensitivity from the 30 repeated holdout datasets, across cutpoints and signal functions.**
